# Supplementary material for: Tracing the Atmospheric Input of Seawater-Dissolvable Pb Based on the Budget of 210Pb in the East Sea (Japan Sea)
Source: Frontiers journal article supplement (doi:10.3389/fmars.2021.756076), 2021-10-28
Supplement: Data_Sheet_1.docx [file Data_Sheet_1.docx]

**
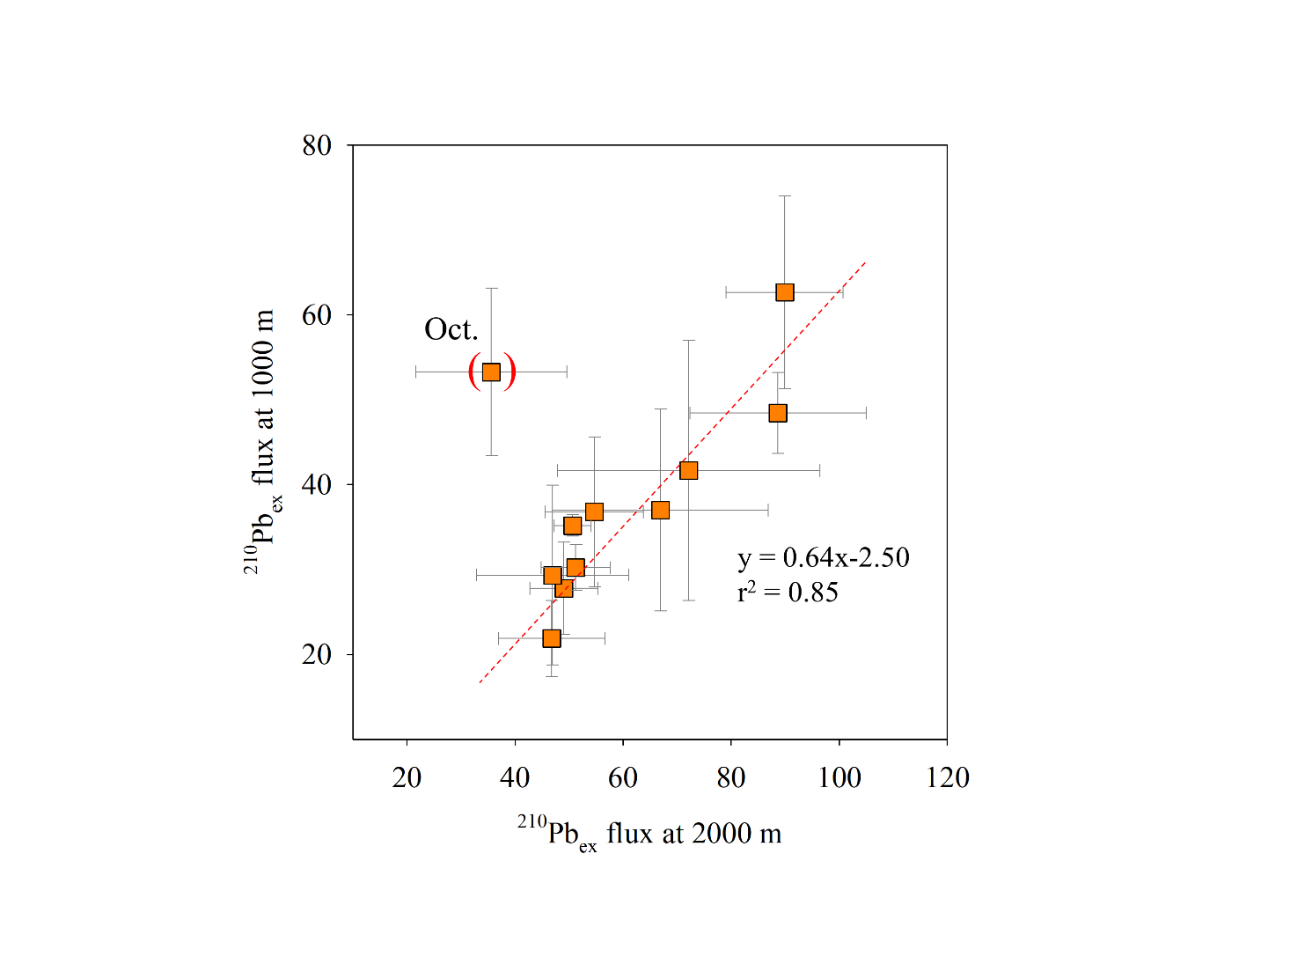
Supplementary Figure S1.** Plots of monthly average 210Pbex fluxes in sinking particles at 1000 m versus those at 2000 m. Errors are from the one standard deviation of the average 210Pbex flux for each month. The red dashed line represents the regression line excluding the values in October.
