# Supplementary material for: Tracing the Atmospheric Input of Seawater-Dissolvable Pb Based on the Budget of 210Pb in the East Sea (Japan Sea)
Source: Frontiers journal article supplement (doi:10.3389/fmars.2021.756076), 2021-10-28
Supplement: Table_1.xlsx [file Table_1.xlsx]

## Sheet: Table S1
Table S1
Activities of total 210Pb (dpm 100L-1) in the East Sea.
Stations	Latitude (oN)	Longtitude (oE)	Depth (m)	210Pb (dpm 100L-1)
M10	39.52	132.34	0	13.0 ± 0.5
			50	9.9 ± 0.5
			100	9.3 ± 0.4
			500	6.6 ± 0.4
			750	7.6 ± 0.5
			1000	5.3 ± 0.4
			1500	6.0 ± 0.4
			2000	7.2 ± 0.4
			2500	6.1 ± 0.3
			2700	6.6 ± 0.4
M13	41	132.34	0	16.4 ± 0.6
			100	9.7 ± 0.4
			500	5.7 ± 0.4
			1000	5.2 ± 0.4
			1500	3.8 ± 0.3
			2000	4.1 ± 0.3
			2500	4.2 ± 0.3
			2700	4.2 ± 0.3
149	42.52	136.99	0	15.8 ± 0.4
			50	15.9 ± 0.4
			100	11.8 ± 0.4
			500	7.7 ± 0.3
			750	6.9 ± 0.3
			1000	7.8 ± 0.3
			1500	6.6 ± 0.3
			2000	4.8 ± 0.5
			2500	4.6 ± 0.5
			3000	4.8 ± 0.5
			3200	4.7 ± 0.5

## Sheet: Table S2
Table S2
Concentrations of dissolved Pb (0.2 < μm; pmol kg-1) in the East Sea.
Stations	Latitude (oN)	Longtitude (oE)	Depth (m)	Dissolved Pb (pmol kg-1)
S1	35.08	129.72	20	64
			50	61
			100	65
			139	54
S4	35.98	130.32	20	62
			50	72
			100	55
			200	54
			300	46
			500	37
			750	33
			1000	18
			1250	7
			1486	4
E1	37	129.67	20	59
			50	53
			100	25
			150	27
			190	38
E5	37	131	10	80
			20	71
			50	78
			100	62
			150	57
			200	57
			300	42
			500	40
			1000	31
			1250	18
			1500	7
			2000	15
			2200	6
E8	37	132	20	74
			50	84
			100	90
			150	86
			200	72
			300	52
			500	43
			750	37
			1000	30
			1250	15
			1500	12
			1785	7
M6	37.67	130.98	10	88
			50	52
			100	45
			150	46
			300	42
			500	34
M9	39	131.6	20	80
			50	86
			150	62
			300	47
			500	37
40	40.4	132.72	10	84
41	40	133.14	10	79
12	44.46	137.84	10	78
134-3	42.5	134	10	107
			100	54
134-9	41.5	134	10	89
			100	53
144	42.87	135.87	10	93
			100	74

## Sheet: Table S3
Table S3
Total mass flux (g m-2 d-1) and activities of 226Ra and 210Pb in the sinking particles (dpm g-1) through the sediment traps (Mooring location: 37.04 oN, 131.08 oE).
Sample No.	Depth (m)	Sampling dates (yy-mm-dd)		Total mass flux (g m-2 d-1)	226Ra (dpm g-1)	210Pb (dpm g-1)
		Start	End
ES9904-01	1000	1998-12-06	1998-12-13	0.48	10.6 ± 0.9	147.0 ± 8.4
ES9904-02	1000	1998-12-13	1998-12-20	0.36	11.0 ± 1.1	158.8 ± 6.9
ES9904-03	1000	1998-12-20	1998-12-27	0.22	12.4 ± 1.9	208.3 ± 14.0
ES9904-04	1000	1998-12-27	1999-01-03	0.25	6.0 ± 1.8	202.9 ± 13.7
ES9904-05	1000	1999-01-03	1999-01-10	0.09	16.3 ± 1.6	207.0 ± 11.9
ES9904-06	1000	1999-01-10	1999-01-17	0.27	8.9 ± 1.1	181.3 ± 5.7
ES9904-07	1000	1999-01-17	1999-01-24	0.22	7.7 ± 1.8	184 ± 15.6
ES9904-08	1000	1999-01-24	1999-01-31	0.21	13.9 ± 1.8	228.7 ± 14.1
ES9904-09	1000	1999-01-31	1999-02-07	0.31	7.9 ± 1.2	169.1 ± 9.9
ES9904-10	1000	1999-02-07	1999-02-14	0.43	6.4 ± 1.0	137.2 ± 9.0
ES9904-11	1000	1999-02-14	1999-02-21	0.67	6.1 ± 0.8	101.3 ± 5.2
ES9904-12	1000	1999-02-21	1999-02-28	0.62	4.0 ± 1.0	134.1 ± 6.5
ES9904-13	1000	1999-02-28	1999-03-07	0.46	5.6 ± 1.3	125.1 ± 9.9
ES9904-14	1000	1999-03-07	1999-03-14	0.78	5.0 ± 1.3	75.3 ± 7.4
ES9904-15	1000	1999-03-14	1999-03-21	0.44	5.2 ± 0.8	124.7 ± 6.1
ES9904-16	1000	1999-03-21	1999-03-28	0.22	12.0 ± 1.2	136.5 ± 6.1
ES9904-17	1000	1999-03-28	1999-04-04	0.16	13.7 ± 1.3	130.1 ± 6.3
ES9904-18	1000	1999-04-04	1999-04-11	0.19	8.0 ± 1.5	117.4 ± 8.3
ES9904-19	1000	1999-04-11	1999-04-18	0.27	7.8 ± 1.2	110.5 ± 7.2
ES9904-20	1000	1999-04-18	1999-04-25	0.44	7.0 ± 1.1	85.5 ± 7.5
ES9904-21	1000	1999-04-25	1999-04-29	1.03	4.6 ± 1.9	70.8 ± 12.7
ES9910-01	1000	1999-05-01	1999-05-08	0.46	7.3 ± 0.9	105.3 ± 5.5
ES9910-02	1000	1999-05-08	1999-05-15	0.23	6.3 ± 1.2	85.9 ± 6.1
ES9910-03	1000	1999-05-15	1999-05-22	0.23	8.0 ± 1.1	102.5 ± 5.9
ES9910-04	1000	1999-05-22	1999-05-29	0.33	4.0 ± 1.5	100.5 ± 4.9
ES9910-05	1000	1999-05-29	1999-06-05	0.33	6.1 ± 2.0	110.3 ± 7.1
ES9910-06	1000	1999-06-05	1999-06-12	0.3	6.4 ± 0.8	101.7 ± 4.7
ES9910-07	1000	1999-06-12	1999-06-19	0.41	4.7 ± 2.6	131.6 ± 11.6
ES9910-08	1000	1999-06-19	1999-06-29	0.29	7.8 ± 1.1	120.9 ± 7.1
ES9910-09	1000	1999-06-29	1999-07-09	0.35	4.1 ± 1.8	107.7 ± 7.4
ES9910-10	1000	1999-07-09	1999-07-19	0.32	6.1 ± 0.9	117 ± 5.8
ES9910-11	1000	1999-07-19	1999-07-29	0.35	7.1 ± 1.0	102.5 ± 7.0
ES9910-12	1000	1999-07-29	1999-08-08	0.31	6.4 ± 1.2	102.7 ± 7.8
ES9910-13	1000	1999-08-08	1999-08-15	0.33	5.6 ± 2.4	93.6 ± 8.3
ES9910-14	1000	1999-08-15	1999-08-22	0.46	5.8 ± 0.9	80.7 ± 6.2
ES9910-15	1000	1999-08-22	1999-08-29	0.35	3.4 ± 1.3	80.7 ± 7.8
ES9910-16	1000	1999-08-29	1999-09-05	0.21	8.8 ± 3.1	108.2 ± 10.6
ES9910-17	1000	1999-09-05	1999-09-12	0.23	11.1 ± 1.6	100.5 ± 10.2
ES9910-18	1000	1999-09-12	1999-09-19	0.16	1.1 ± 4.1	90.5 ± 12.2
ES9910-19	1000	1999-09-19	1999-09-26	0.24	9.7 ± 2.0	109.4 ± 12.9
ES9910-20	1000	1999-09-26	1999-10-03	0.25	10.6 ± 2.2	125.5 ± 14.1
ES9910-21	1000	1999-10-03	1999-10-05	0.5	16.9 ± 3.0	105.6 ± 17.2
ES0001-01	1000	1999-10-09	1999-10-15	0.27	10.8 ± 1.5	156.5 ± 9.6
ES0001-02	1000	1999-10-15	1999-10-20	0.4	6.8 ± 1.2	136.5 ± 7.4
ES0001-03	1000	1999-10-20	1999-10-24	0.36	13.4 ± 1.3	204.7 ± 11.0
ES0001-04	1000	1999-10-24	1999-10-27	0.44	9.9 ± 1.6	153.7 ± 12.6
ES0001-05	1000	1999-10-27	1999-10-30	0.43	9.5 ± 1.8	146.4 ± 9.9
ES0001-06	1000	1999-10-30	1999-11-02	0.46	9.7 ± 0.7	113.8 ± 5.6
ES0001-07	1000	1999-11-02	1999-11-04	0.7	10.1 ± 1.0	126.9 ± 6.4
ES0001-08	1000	1999-11-04	1999-11-06	1.01	6.6 ± 1.1	89.3 ± 6.5
ES0001-09	1000	1999-11-06	1999-11-08	1.27	5.0 ± 0.8	75.9 ± 4.3
ES0001-10	1000	1999-11-08	1999-11-11	0.49	9.1 ± 1.1	98.2 ± 7.7
ES0001-11	1000	1999-11-11	1999-11-14	­	­	­
ES0001-12	1000	1999-11-14	1999-11-17	­	­	­
ES0001-13	1000	1999-11-17	1999-11-21	­	­	­
ES0001-14	1000	1999-11-21	1999-11-25	­	­	­
ES0001-15	1000	1999-11-25	1999-11-29	­	­	­
ES0001-16	1000	1999-11-29	1999-12-04	­	­	­
ES0001-17	1000	1999-12-04	1999-12-11	­	­	­
ES9904-01	2000	1998-12-06	1998-12-13	­	­	­
ES9904-02	2000	1998-12-13	1998-12-20	0.28	11.7 ± 1.0	298.3 ± 9.1
ES9904-03	2000	1998-12-20	1998-12-27	0.4	7.6 ± 0.8	285.5 ± 7.5
ES9904-04	2000	1998-12-27	1999-01-03	0.28	13.2 ± 1.0	279.9 ± 9.4
ES9904-05	2000	1999-01-03	1999-01-10	0.27	5.4 ± 1.3	253.9 ± 10.4
ES9904-06	2000	1999-01-10	1999-01-17	0.18	7.1 ± 1.1	345.1 ± 10.6
ES9904-07	2000	1999-01-17	1999-01-24	0.16	19 ± 1.6	291.1 ± 13.3
ES9904-08	2000	1999-01-24	1999-01-31	0.28	12.1 ± 1.7	363.7 ± 13.9
ES9904-09	2000	1999-01-31	1999-02-07	0.29	5.2 ± 1.1	265.2 ± 9.6
ES9904-10	2000	1999-02-07	1999-02-14	0.45	9.4 ± 1.2	205.5 ± 13.3
ES9904-11	2000	1999-02-14	1999-02-21	0.58	4.2 ± 0.8	185.5 ± 7.4
ES9904-12	2000	1999-02-21	1999-02-28	0.67	5.2 ± 0.5	143.8 ± 5.2
ES9904-13	2000	1999-02-28	1999-03-07	0.52	5.1 ± 0.7	197.4 ± 6.6
ES9904-14	2000	1999-03-07	1999-03-14	0.44	8.4 ± 1.1	117.1 ± 11.3
ES9904-15	2000	1999-03-14	1999-03-21	0.68	4.7 ± 1.1	156.3 ± 9.8
ES9904-16	2000	1999-03-21	1999-03-28	0.26	9.5 ± 3.4	236.8 ± 28.3
ES9904-17	2000	1999-03-28	1999-04-04	0.21	9 ± 3.3	248.1 ± 29.4
ES9904-18	2000	1999-04-04	1999-04-11	0.2	1.7 ± 3.5	202.2 ± 25.3
ES9904-19	2000	1999-04-11	1999-04-18	0.21	9.8 ± 4.3	244.4 ± 37.1
ES9904-20	2000	1999-04-18	1999-04-25	0.29	3.1 ± 3.6	193.4 ± 33.0
ES9904-21	2000	1999-04-25	1999-04-29	­	­	­
ES9910-01	2000	1999-05-01	1999-05-08	0.48	4.8 ± 0.6	141.0 ± 3.9
ES9910-02	2000	1999-05-08	1999-05-15	0.16	9.4 ± 2.3	176.3 ± 8.6
ES9910-03	2000	1999-05-15	1999-05-22	0.21	9.9 ± 2.1	228.8 ± 8.5
ES9910-04	2000	1999-05-22	1999-05-29	0.28	5.3 ± 2.3	188.1 ± 8.2
ES9910-05	2000	1999-05-29	1999-06-05	0.27	10.9 ± 1.4	264.8 ± 9.0
ES9910-06	2000	1999-06-05	1999-06-12	0.3	6.7 ± 1.0	197.5 ± 6.4
ES9910-07	2000	1999-06-12	1999-06-19	0.43	5.8 ± 1.5	115.4 ± 5.5
ES9910-08	2000	1999-06-19	1999-06-29	0.35	4.7 ± 1.5	135.8 ± 6.2
ES9910-09	2000	1999-06-29	1999-07-09	0.29	7.6 ± 1.0	182.6 ± 6.5
ES9910-10	2000	1999-07-09	1999-07-19	0.31	6.7 ± 1.0	156.3 ± 7.0
ES9910-11	2000	1999-07-19	1999-07-29	0.33	4.0 ± 1.6	168.6 ± 6.3
ES9910-12	2000	1999-07-29	1999-08-08	0.28	5.4 ± 1.0	153.8 ± 7.1
ES9910-13	2000	1999-08-08	1999-08-15	0.32	6.0 ± 1.3	183.9 ± 7.9
ES9910-14	2000	1999-08-15	1999-08-22	0.29	4.9 ± 2.6	178.8 ± 9.0
ES9910-15	2000	1999-08-22	1999-08-29	0.36	6.0 ± 1.1	165.5 ± 7.6
ES9910-16	2000	1999-08-29	1999-09-05	0.22	6.2 ± 3.2	252.7 ± 11.8
ES9910-17	2000	1999-09-05	1999-09-12	0.25	5.8 ± 1.6	244.4 ± 10.6
ES9910-18	2000	1999-09-12	1999-09-19	0.21	3.6 ± 3.3	221.0 ± 11.0
ES9910-19	2000	1999-09-19	1999-09-26	0.18	6.4 ± 3.9	222.5 ± 13.8
ES9910-20	2000	1999-09-26	1999-10-03	0.15	14.7 ± 3.1	242.2 ± 18.9
ES9910-21	2000	1999-10-03	1999-10-05	0.34	16.0 ± 7.1	196.2 ± 24.3
ES0001-01	2000	1999-10-09	1999-10-15	0.15	10.1 ± 1.9	115.7 ± 5.0
ES0001-02	2000	1999-10-15	1999-10-20	0.23	8.6 ± 1.2	110.0 ± 4.4
ES0001-03	2000	1999-10-20	1999-10-24	0.29	7.0 ± 1.7	98.5 ± 5.7
ES0001-04	2000	1999-10-24	1999-10-27	0.3	8.9 ± 1.5	132.7 ± 5.7
ES0001-05	2000	1999-10-27	1999-10-30	0.3	8.8 ± 1.4	140.0 ± 7.3
ES0001-06	2000	1999-10-30	1999-11-02	0.32	13.4 ± 1.7	157.9 ± 10.0
ES0001-07	2000	1999-11-02	1999-11-04	0.32	10.8 ± 3.4	175.5 ± 16.7
ES0001-08	2000	1999-11-04	1999-11-06	0.38	11.8 ± 1.7	192.2 ± 13.6
ES0001-09	2000	1999-11-06	1999-11-08	0.59	8.5 ± 1.8	120.5 ± 7.9
ES0001-10	2000	1999-11-08	1999-11-11	0.84	6.4 ± 0.8	66.6 ± 2.4
ES0001-11	2000	1999-11-11	1999-11-14	0.7	4.4 ± 1.3	71.4 ± 2.9
ES0001-12	2000	1999-11-14	1999-11-17	0.66	5.7 ± 0.9	75.8 ± 3.4
ES0001-13	2000	1999-11-17	1999-11-21	0.63	7.7 ± 1.0	57.8 ± 2.4
ES0001-14	2000	1999-11-21	1999-11-25	0.58	4.6 ± 0.8	66.0 ± 2.5
ES0001-15	2000	1999-11-25	1999-11-29	0.63	7.6 ± 1.1	59.2 ± 2.5
ES0001-16	2000	1999-11-29	1999-12-04	0.56	6.2 ± 0.7	56.1 ± 1.9
ES0001-17	2000	1999-12-04	1999-12-11	0.43	8.0 ± 0.9	47.9 ± 1.6

## Sheet: Table S4
Table S4
Analytical results (pmol kg-1) of the blank, detection limit, certified reference materials (CASS-6 and NASS-7), and GEOTRACES reference standards (GSC and GSP).
Element	Blank	Detection limita	GSC (n=5)		GSP (n=5)		NASS-7 (n=3)		CASS-6 (n=5)
			This study	Consensus valueb	This study	Consensus valueb	This study	Certified value	This study	Certified value
Pb	3.9	2.8	38 ± 2	39 ± 4	64 ± 4	62 ± 5	11 ± 3	12 ± 4	50 ± 2	50 ± 19
aThe detection limit was calculated by three times the standard deviation of the blank
bhttps://www.geotraces.org/new-consensus-values-available/
